# Supplementary material for: Outcomes of Superior Capsular Reconstruction Using the Long Head of the Biceps Tendon in Large to Massive Rotator Cuff Tears: A Meta-Analysis and Systematic Review
Source: MDPI journal article supplement (doi:10.3390/jcm13041052), 2024-02-12
Supplement: s1 [file s1]

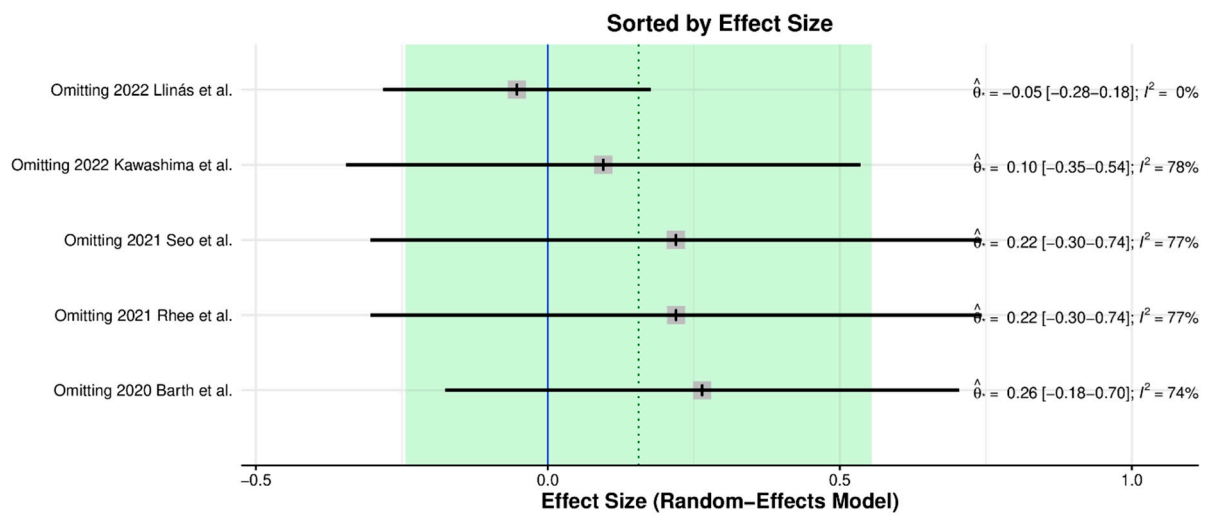

**Supplementary Figure S1.** Sensitivity analysis for ASES score

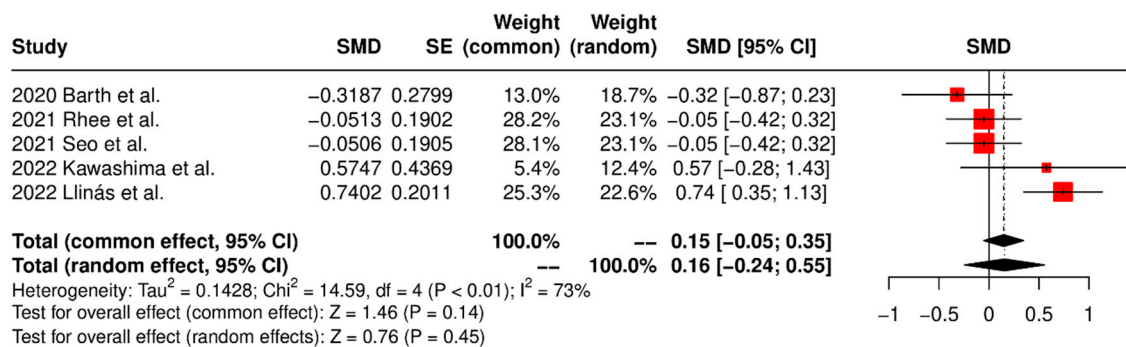

**Supplementary Figure S2.** Forest plot of ASES score before sensitivity analyses

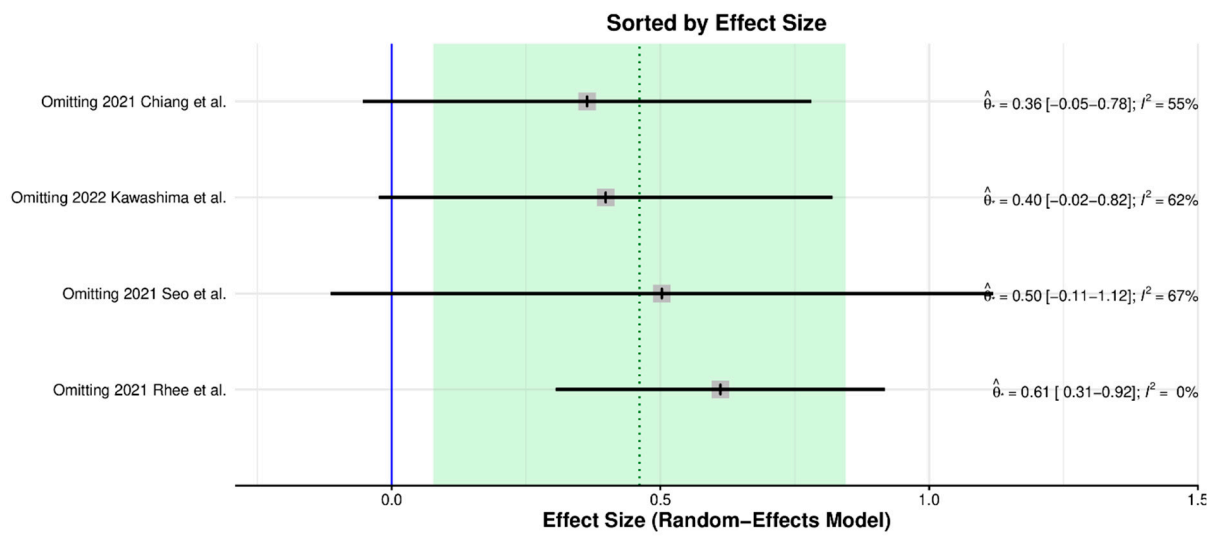

**Supplementary Figure S3.** Sensitivity analysis for AHI

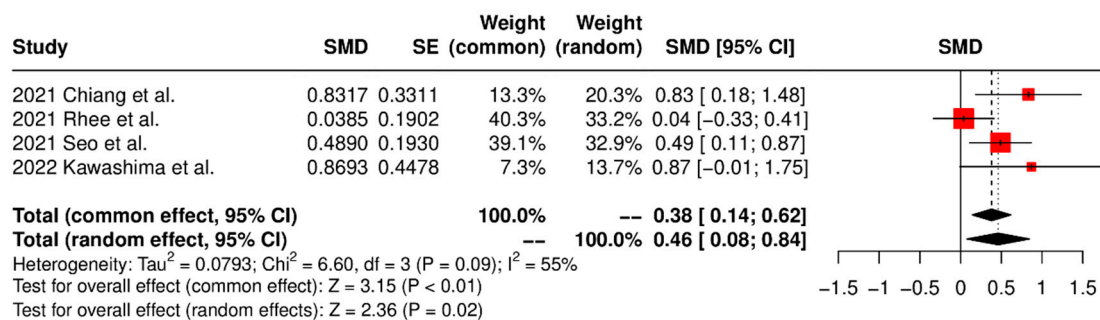

**Supplementary Figure S4.** Forest plot of AHI score before sensitivity analyses

**Supplementary table S1.** Summary of subgroup analyses according to SCR techniques

|                         | SCR using LHBT with distal tenotomy |          |          |                   |         | SCR using LHBT without distal tenotomy |          |          |                   |         | Statistical significance |
|-------------------------|-------------------------------------|----------|----------|-------------------|---------|----------------------------------------|----------|----------|-------------------|---------|--------------------------|
|                         | OR or SMD                           | LL 95%CI | UL 95%CI | Number of studies | P value | OR or SMD                              | LL 95%CI | UL 95%CI | Number of studies | P value |                          |
| Retear rate             | 0.13                                | 0.05     | 0.30     | 3                 | <0.01   | 0.28                                   | 0.14     | 0.57     | 3                 | <0.01   | No difference            |
| ASES score              | 0.26                                | -0.39    | 0.90     | 2                 | 0.44    | 0.09                                   | -0.46    | 0.63     | 3                 | 0.76    | No difference            |
| VAS                     | -0.31                               | -0.62    | 0.01     | 2                 | 0.06    | 0.05                                   | -0.21    | 0.31     | 2                 | 0.71    | No difference            |
| ROM (Forward flexion)   | 0.22 <sup>a</sup>                   | -0.56    | 1.00     | 1                 | 0.58    | 0.39                                   | -0.04    | 0.83     | 3                 | 0.07    | No difference            |
| ROM (External rotation) | -0.29                               | -0.61    | 0.04     | 2                 | 0.08    | 0.03                                   | -0.23    | 0.29     | 3                 | 0.82    | No difference            |
| Acromiohumeral interval | 0.83 <sup>a</sup>                   | -0.01    | 1.67     | 1                 | 0.05    | 0.36                                   | -0.05    | 0.78     | 3                 | 0.09    | No difference            |

SCR, superior capsular reconstruction; OR, odds ratio; SMD, standardized mean difference; LL, lower limit; CI, confidence interval; UL, upper limit VAS, visual analog scale; ASES, the American Shoulder and Elbow Surgeons score; ROM, range of motion

<sup>a</sup> Estimates based on one study
